# Supplementary material for: Photocatalytic hydrogenolysis of epoxides using alcohols as reducing agents on TiO2 loaded with Pt nanoparticles
Source: Royal Society of Chemistry journal article supplement (doi:10.1039/c4cc09307k), 2014-12-19
Supplement: c4cc09307k1.pdf [file c4cc09307k1.pdf]

## Photocatalytic hydrogenolysis of epoxides with alcohol as a reducing agent on TiO<sub>2</sub> loaded with Pt nanoparticles

Hiroaki Hirakawa,<sup>a</sup> Yasuhiro Shiraishi,<sup>\*a,b</sup> Hirokatsu Sakamoto,<sup>a</sup> Satoshi Ichikawa,<sup>c</sup> Shunsuke Tanaka,<sup>d</sup> and Takayuki Hirai<sup>a</sup>

<sup>a</sup> *Research Center for Solar Energy Chemistry, and Division of Chemical Engineering, Graduate School of Engineering Science, Osaka University, Toyonaka 560-8531, Japan*

<sup>b</sup> *PRESTO, JST, Saitama 332-0012, Japan*

<sup>c</sup> *Institute for NanoScience Design Center, Osaka University, Toyonaka 560-8531, Japan*

<sup>d</sup> *Department of Chemical, Energy and Environmental Engineering, Kansai University, Suita 564-8680, Japan*

*E-mail: shiraish@cheng.es.osaka-u.ac.jp*

### Electronic Supplementary Information (ESI†)

#### Photoreaction

Each of the respective epoxides was dissolved in an alcohol solution (5 mL). The solution and catalyst were added to a Pyrex glass tube ( $\varnothing$  12 mm; capacity, 20 mL), and the tube was sealed with a rubber septum cap. The catalyst was dispersed well by ultrasonication for 5 min, and N<sub>2</sub> was bubbled through the solution for 5 min. The tube was photoirradiated with magnetic stirring using a 2 kW Xe lamp (USHIO Inc.;  $\lambda > 300$  nm).<sup>[1]</sup> The temperature of solution during photoirradiation was ca. 303 K. After the reactions, the catalyst was recovered by centrifugation, and the solution was analyzed by GC–FID (Shimadzu GC-2040 system) equipped with a DB-17 capillary column (Agilent Technologies, 30 m  $\times$  0.250 mm  $\times$  0.25  $\mu$ m). The substrate and product concentrations were calibrated with authentic samples. The analysis was performed at least three times, where the errors were  $\pm 0.2\%$ . Products were identified using a GC–MS system (Shimadzu GCMS-QP5050A).

#### Analysis

TEM observations were performed using an FEI Tecnai G2 20ST analytical electron microscope operated at 200 kV.<sup>[2]</sup> XRD patterns were measured on a Philips X'Pert-MPD spectrometer. Diffuse-reflectance (DR) UV-vis spectra were measured on an UV-vis spectrophotometer (JASCO Corp.; V-550) equipped with Integrated Sphere Apparatus ISV-469, using BaSO<sub>4</sub> as a reference.<sup>[3]</sup> DRIFT analysis was carried out on a FT/IR 610 system,<sup>[4]</sup> equipped with an in-situ DR cell (Heat Chamber HC-500, ST Japan, Inc.). Monochromatic light (360 nm) was irradiated by a Xe lamp (300 W; Asahi Spectra Co. Ltd.; Max-302) equipped with 360 nm band-pass filter.

## References

- [1] Y. Shiraishi, Y. Sugano, S. Tanaka and T. Hirai, *Angew. Chem., Int. Ed.*, 2010, **49**, 1656–1660.
- [2] Y. Shiraishi, K. Tanaka, E. Shirakawa, Y. Sugano, S. Ichikawa, S. Tanaka and T. Hirai, *Angew. Chem. Int. Ed.*, 2013, **52**, 8304–8308.
- [3] Y. Shiraishi, S. Kanazawa, Y. Kofuji, H. Sakamoto, S. Ichikawa, S. Tanaka and T. Hirai, *Angew. Chem. Int. Ed.*, 2014, **53**, 13454–13459.
- [4] Y. Shiraishi, H. Hirakawa, Y. Togawa and T. Hirai, *ACS Catal.*, 2014, **4**, 1642–1649.

### Au<sub>2</sub>/TiO<sub>2</sub> (prepared by deposition-precipitation method)

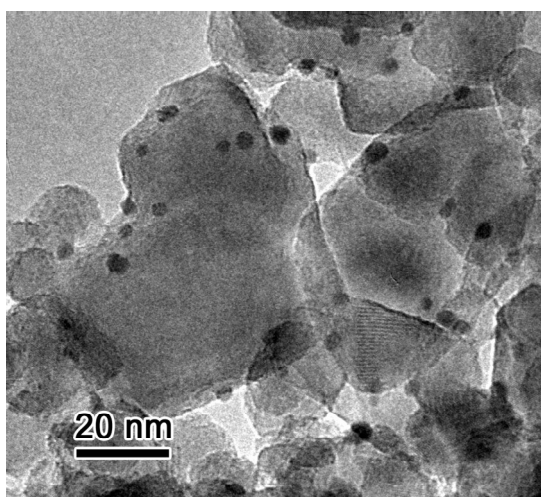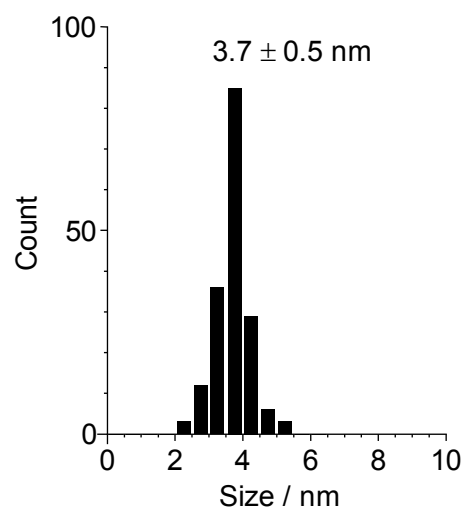

### Ag<sub>2</sub>/TiO<sub>2</sub> (prepared by H<sub>2</sub> reduction at 673 K)

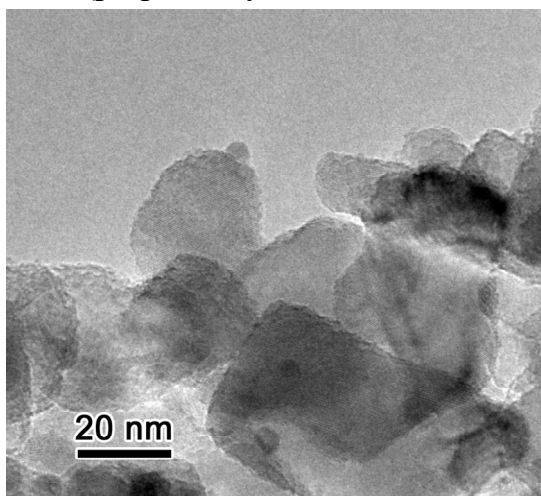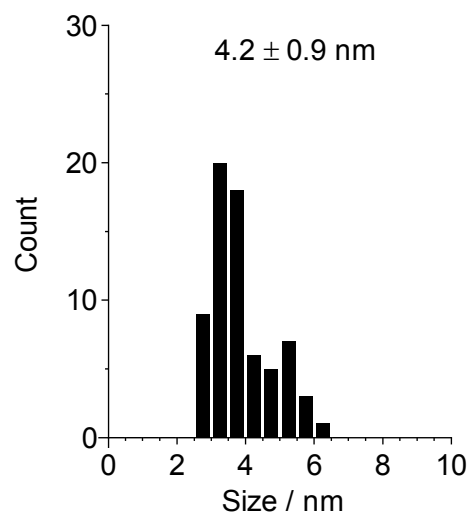

**Pd<sub>2</sub>/TiO<sub>2</sub> (prepared by H<sub>2</sub> reduction at 673 K)**

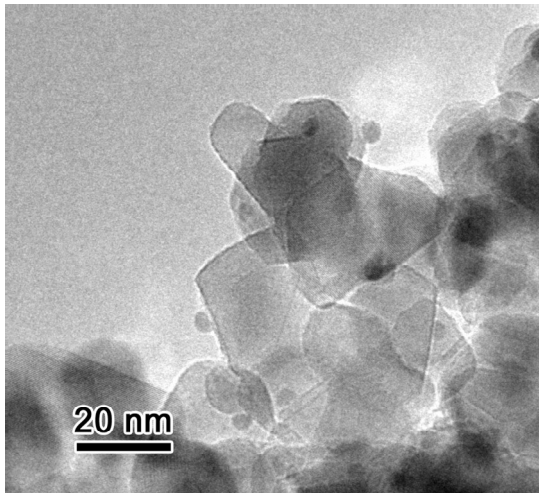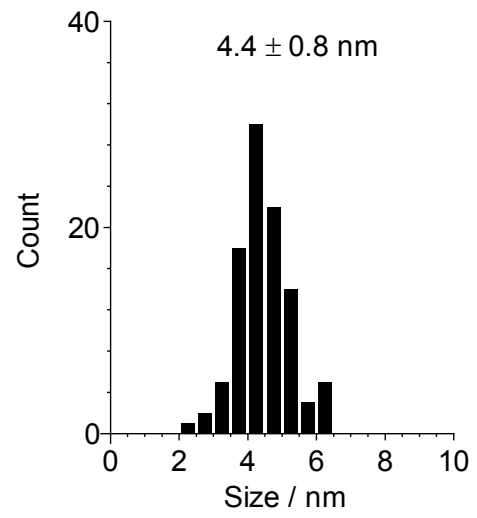

**Pt<sub>2</sub>/TiO<sub>2</sub> (prepared by H<sub>2</sub> reduction at 573 K)**

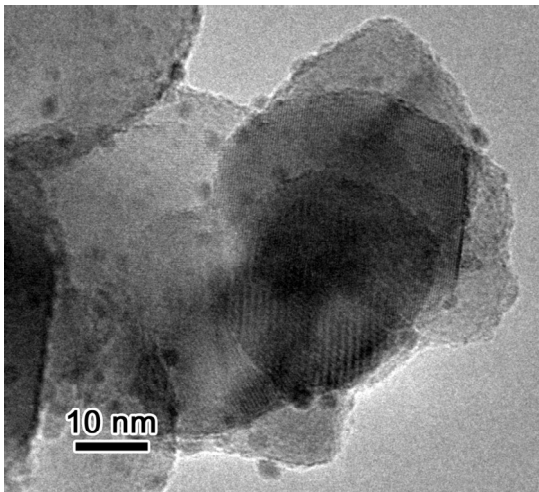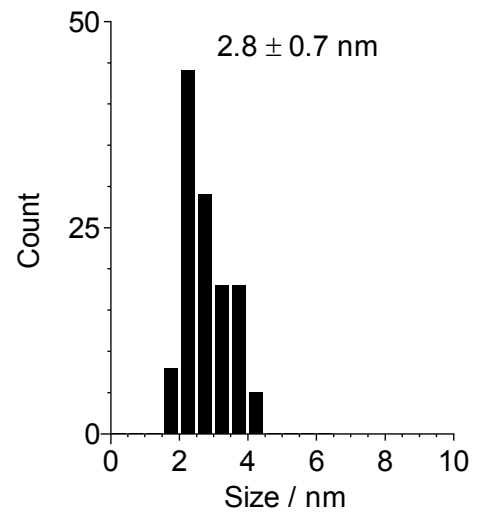

**Pt<sub>2</sub>/TiO<sub>2</sub> (prepared by H<sub>2</sub> reduction at 773 K)**

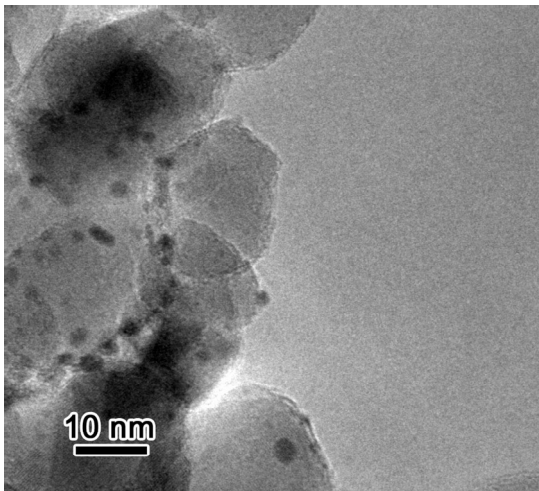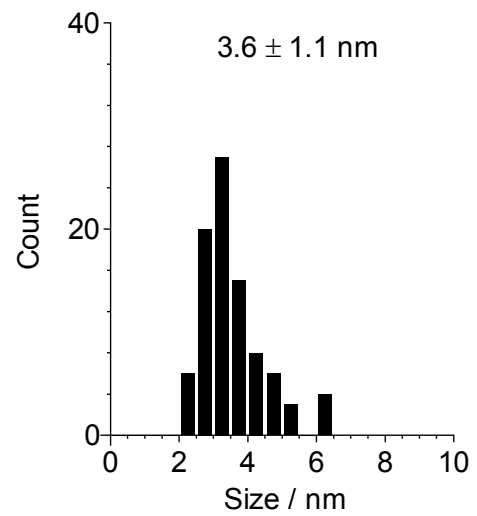

**Pt<sub>2</sub>/TiO<sub>2</sub> (prepared by H<sub>2</sub> reduction at 873 K)**

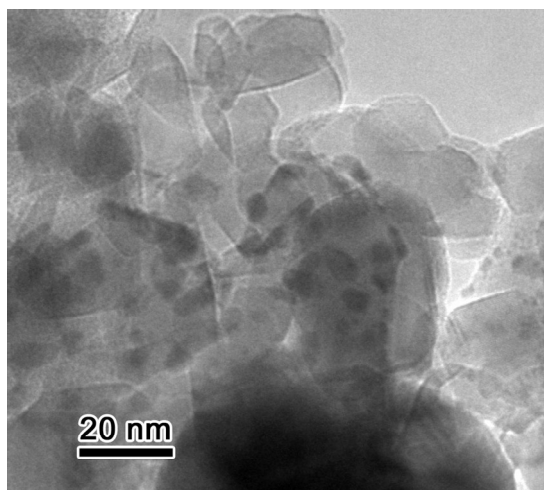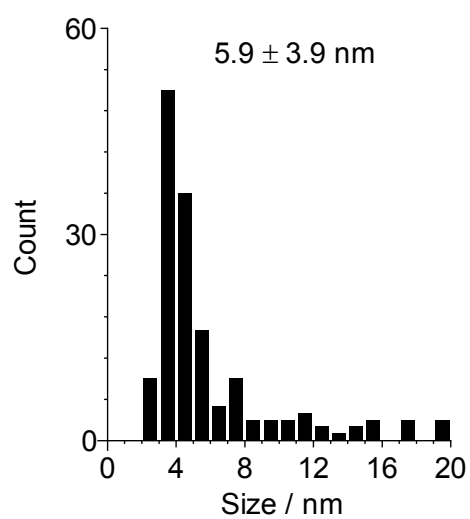

**Pt<sub>0.5</sub>/TiO<sub>2</sub> (prepared by H<sub>2</sub> reduction at 673 K)**

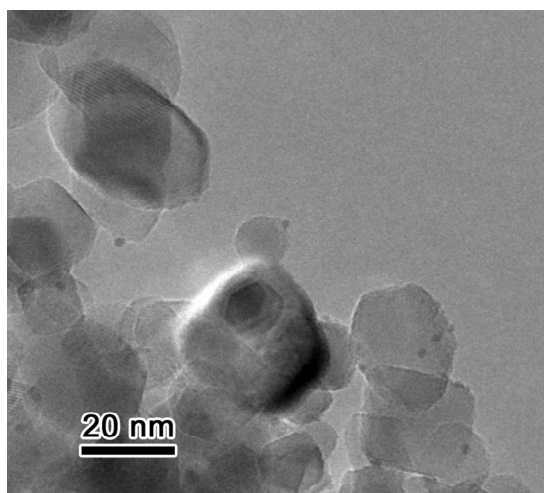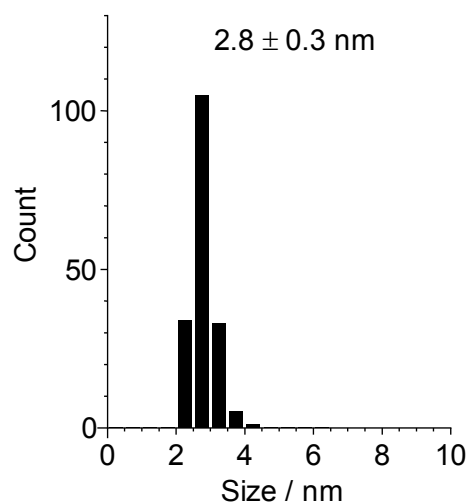

**Pt<sub>4</sub>/TiO<sub>2</sub> (prepared by H<sub>2</sub> reduction at 673 K)**

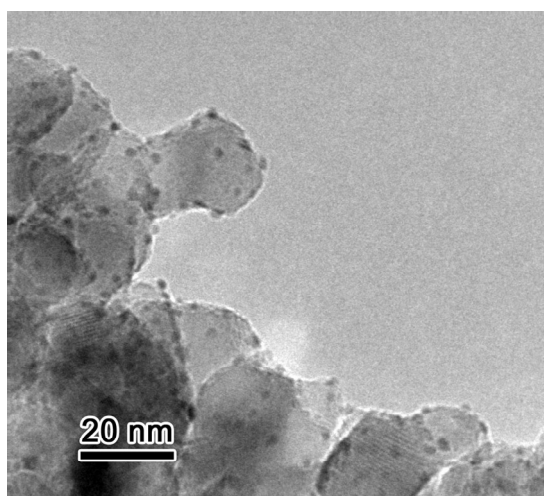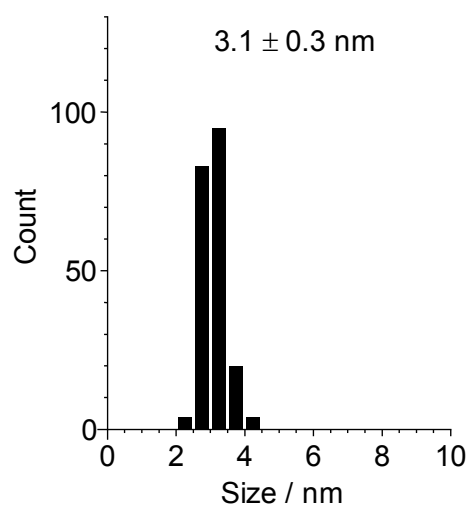

**Fig. S1** Typical TEM images of M<sub>x</sub>/TiO<sub>2</sub> catalysts and size distributions of metal particles.

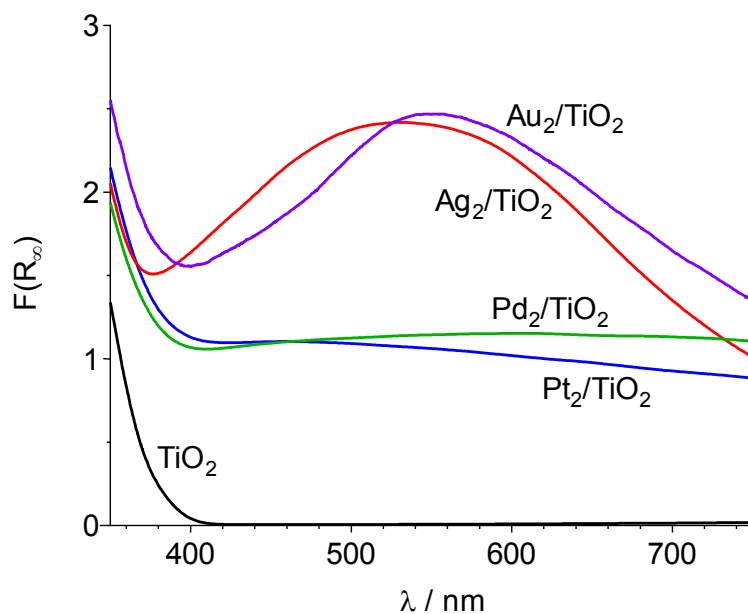

**Fig. S2** Diffuse reflectance UV-vis spectra of the catalysts.

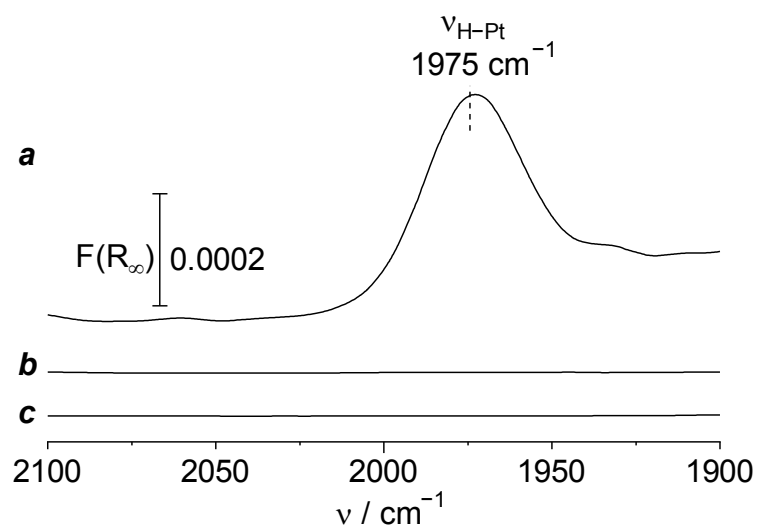

**Fig. S3** (a) DRIFT spectrum measured on  $\text{Pt}_2/\text{TiO}_2$  with 2-PrOH under 360 nm light irradiation. The spectrum was measured as follows:  $\text{Pt}_2/\text{TiO}_2$  (20 mg) was placed in a DR cell and evacuated (5.5 Pa) at 423 K for 3 h. 2-PrOH (42  $\mu\text{mol}$ ) was introduced to the cell at 303 K and left for 5 min under photoirradiation. The measurement was started with continued photoirradiation. Attenuated total reflection (ATR) spectra of (b) acetone and (c) 2-PrOH measured at 303 K are also shown.

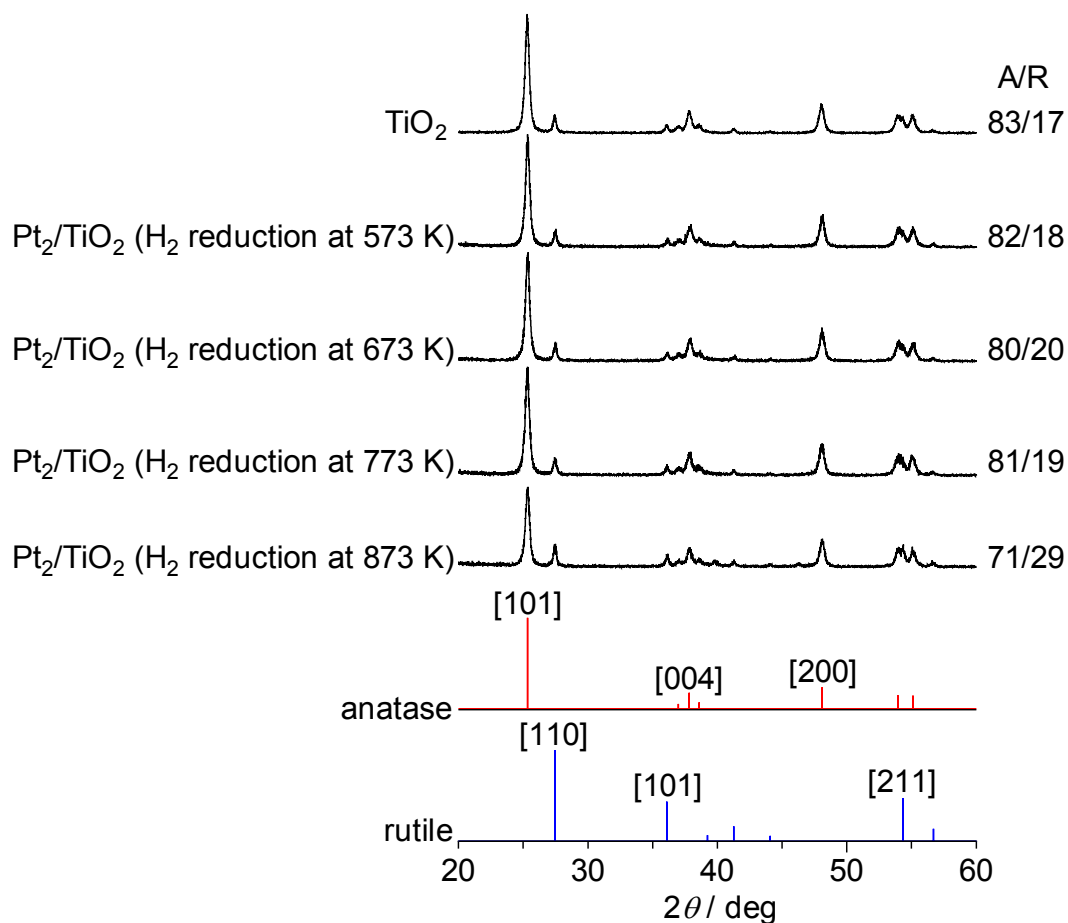

**Fig. S4** XRD patterns of  $\text{Pt}_2/\text{TiO}_2$  prepared at different  $\text{H}_2$  reduction temperature. The anatase (A) and rutile (R) contents were determined with the equation:  $A (\%) = I_{A(101)} / [I_{A(101)} + 1.4I_{R(110)}] \times 100$  (G. Ramis, G. Busca, C. Cristiani, L. Lietti, P. Forzatti and F. Bregani, *Langmuir*, 1992, **8**, 1744–1749).
